# Supplementary material for: Inferring the temperature dependence of population parameters: the effects of experimental design and inference algorithm
Source: PubMed Central journal article supplement (PMC4278823; doi:10.1002/ece3.1309), 2014-12-02

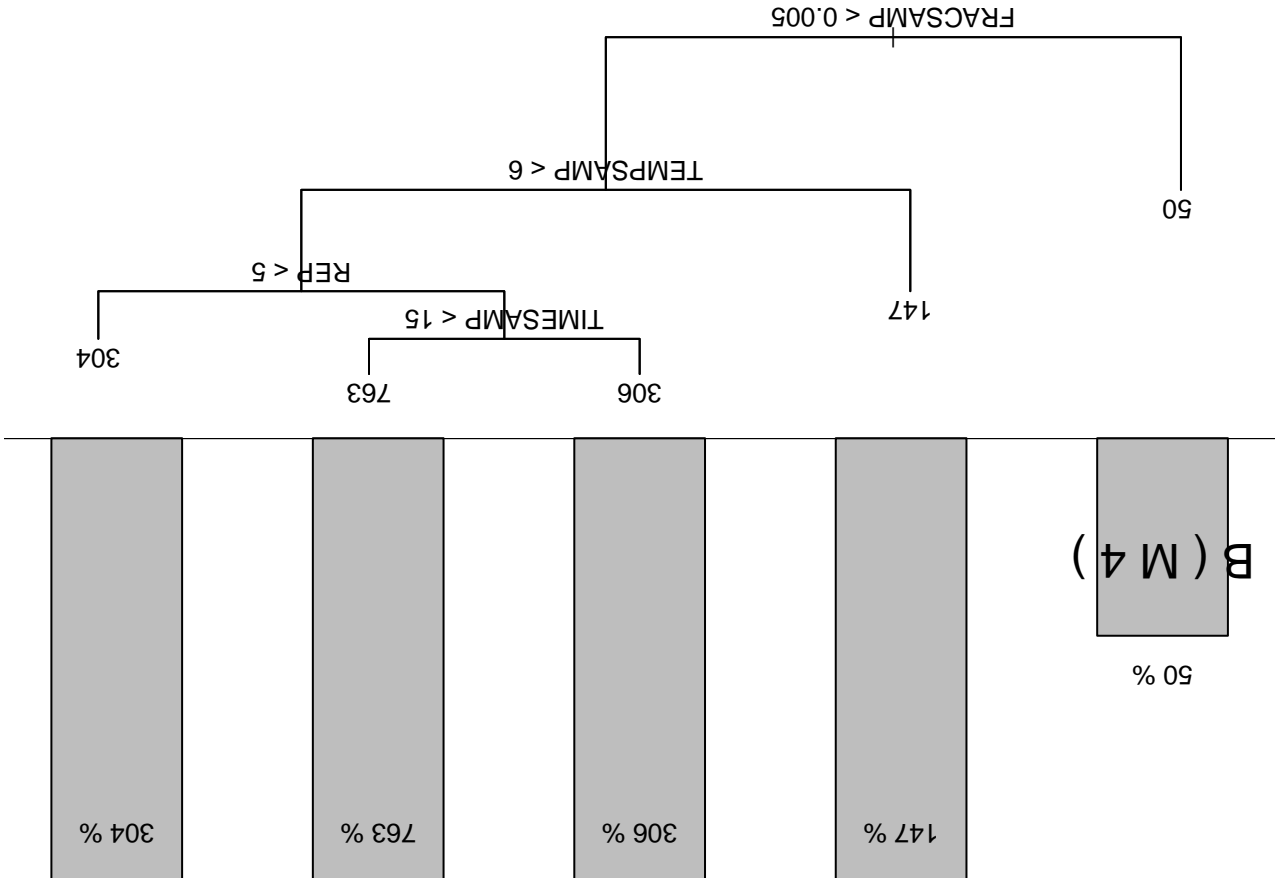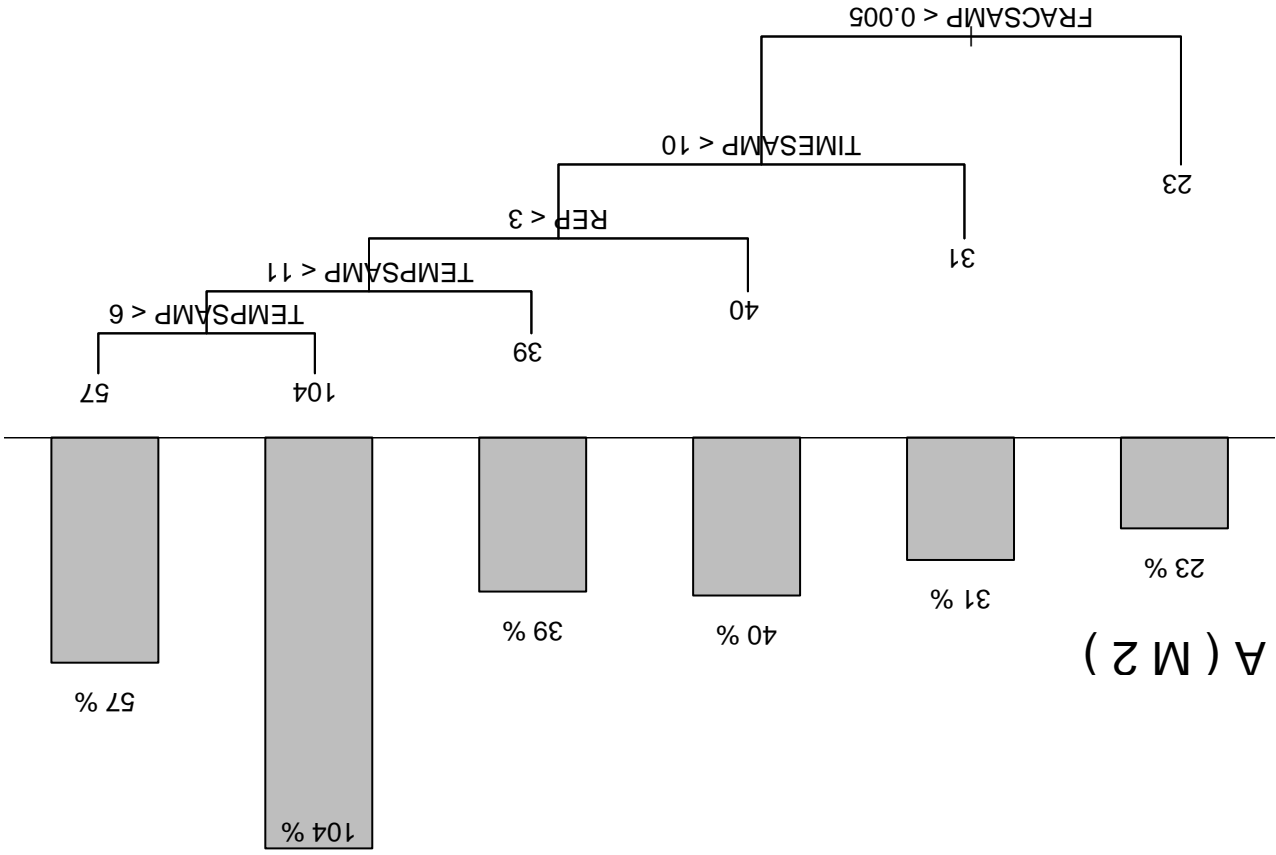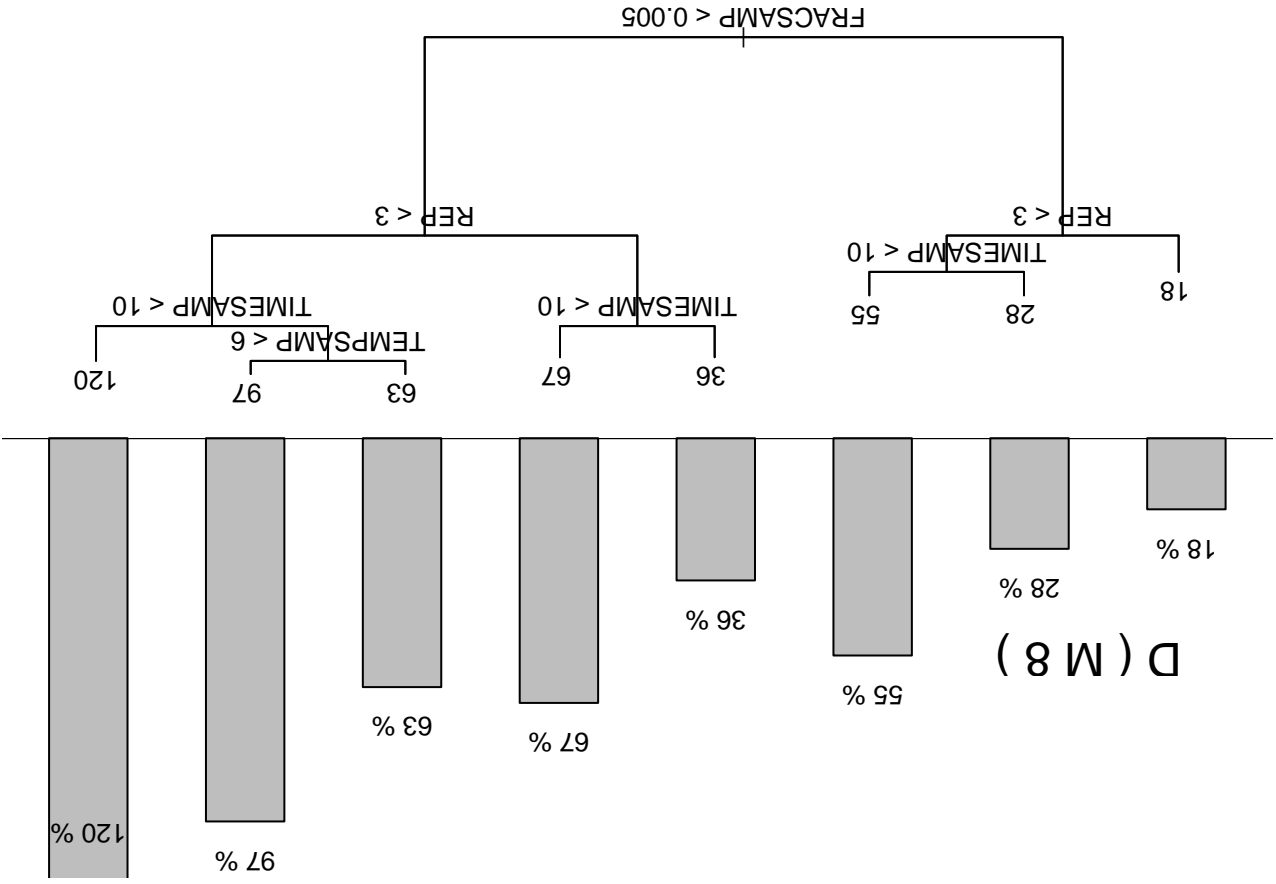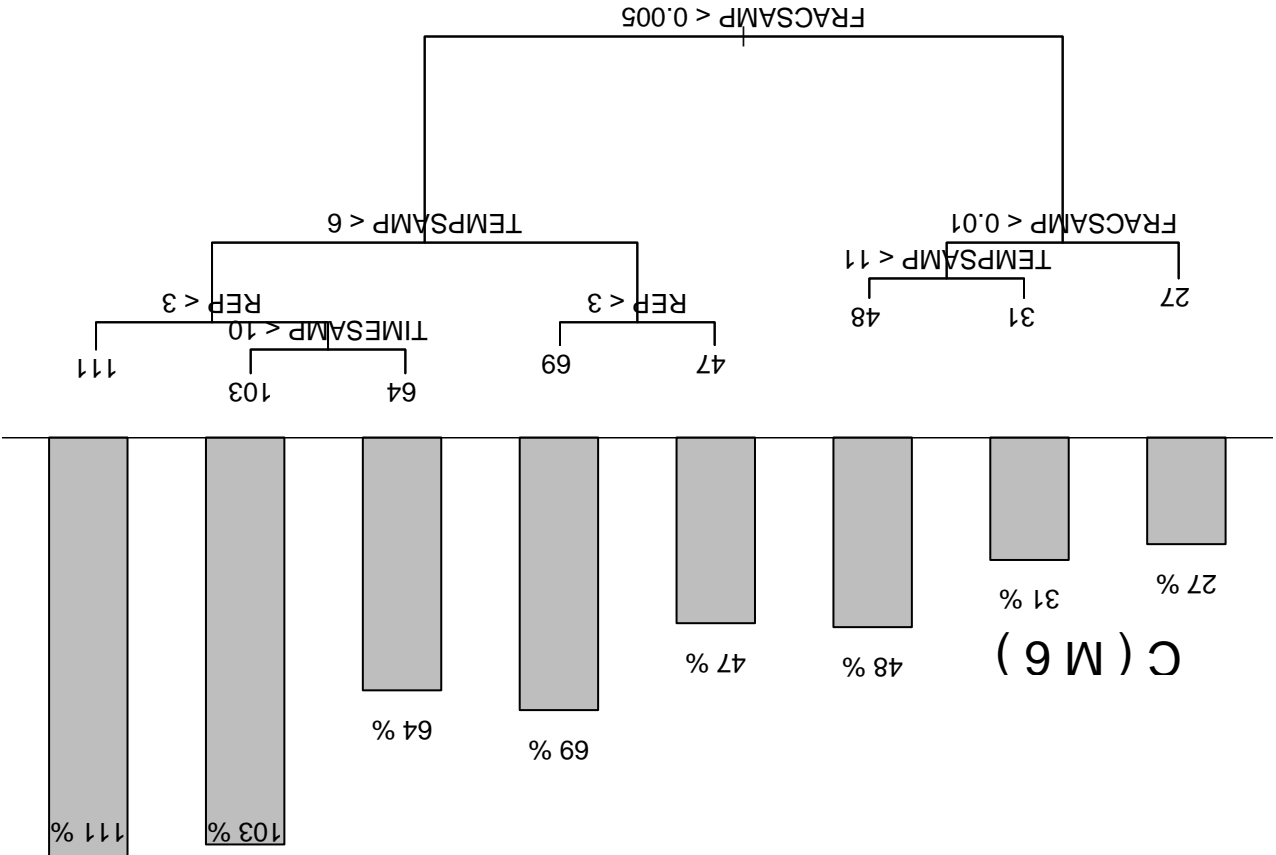

Supplement: ece30004-4736-sd3.pdf [file ece30004-4736-sd3.pdf]
